# Supplementary material
Source: MDPI journal article supplement (https://www.mdpi.com/2075-5309/12/10/1587)
Supplement: s1 [file s1]

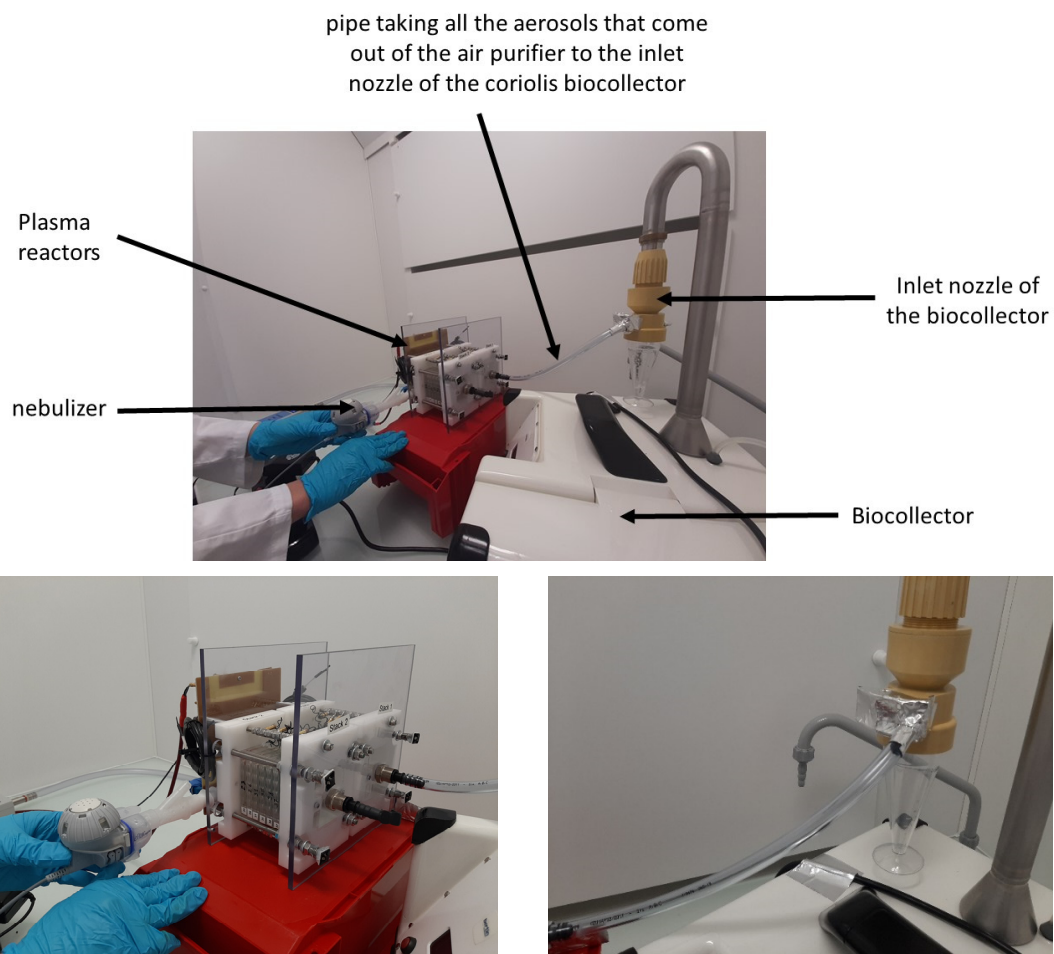

**Figure S1.** Experimental set-up developed in the laboratory to perform the tests

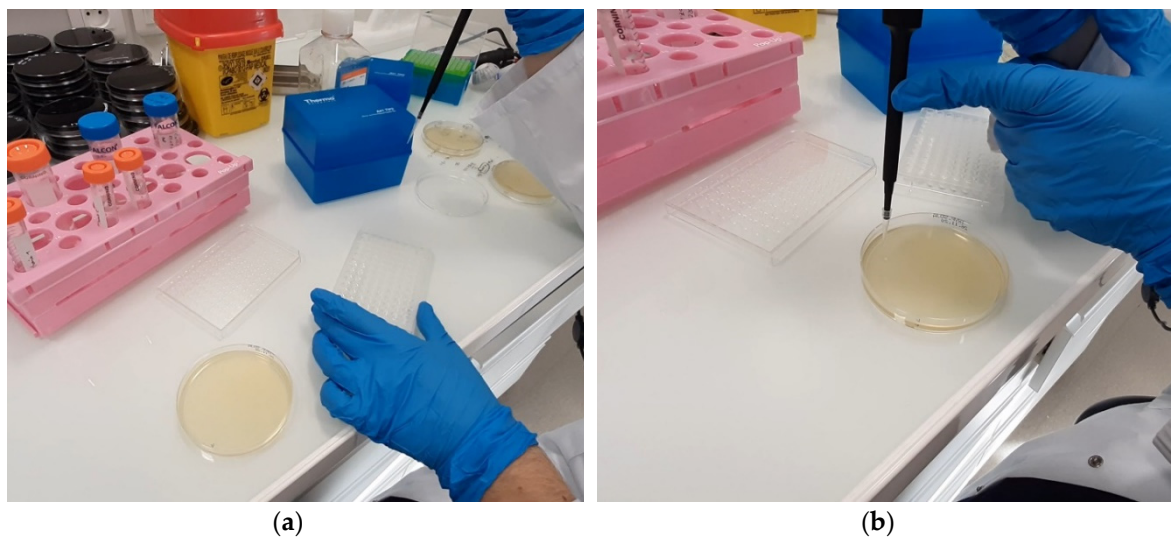

**Figure S2.** (a) Dilution of the phage solution to be titrated from  $10^{-1}$  to  $10^{-12}$  in 96 well plates. (b) Deposit on bacterial culture of successive dilutions of the viral solutions collected by the Coriolis.

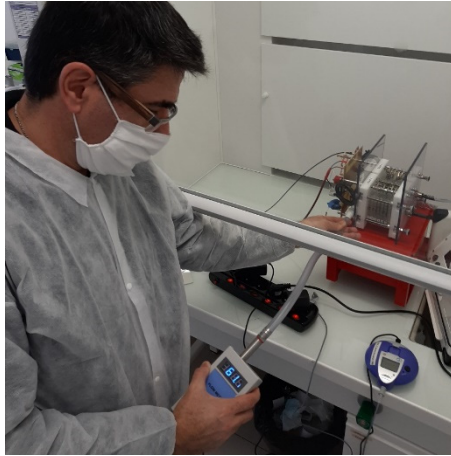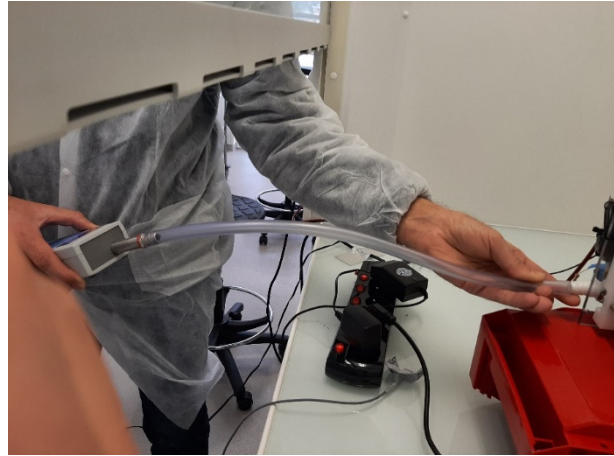

**Figure S3.** Measurement of the air flow in the purifier before each of the experiments.

**Table S1.** Complete table with experimental results showing for the different operating conditions: nebulization duration, flow rate at the inlet of the air cleaner, total nebulized volume, viral load nebulized, bioaerosol volume collected by the Coriolis® device, concentration of virus in the Coriolis® jar, and virus load collected by the Coriolis® device.

|                                                      |     | Nebulization duration (s) | Airflow air cleaner (L/min) | Nebulized volume (ml) | Amount of virus nebulized (PFU) | Volume recovered by the Coriolis (ml) | [phage] on the Coriolis (PFU/ml) | Amount of virus collected by the Coriolis (PFU) |
|------------------------------------------------------|-----|---------------------------|-----------------------------|-----------------------|---------------------------------|---------------------------------------|----------------------------------|-------------------------------------------------|
| Reference condition with the air purifier turned off | N=1 | 155                       | 62.8                        | 2.054                 | 4.11E+10                        | 2.773                                 | 1.00E+06                         | 2.77E+06                                        |
|                                                      | N=2 | 180                       | 63.4                        | 2.115                 | 4.23E+10                        | 2.673                                 | 3.00E+05                         | 8.02E+05                                        |
|                                                      | N=3 | 162                       | 63.1                        | 1.925                 | 3.85E+10                        | 2.648                                 | 2.00E+05                         | 5.30E+05                                        |
|                                                      | N=4 | 136                       | 63.3                        | 1.962                 | 3.92E+10                        | 2.613                                 | 1.00E+05                         | 2.61E+05                                        |
|                                                      | N=5 | 138                       | 62.8                        | 1.988                 | 3.98E+10                        | 2.766                                 | 1.00E+05                         | 2.77E+05                                        |
| <b>Mean</b>                                          |     | <b>154</b>                | <b>63.1</b>                 | <b>2.009</b>          | <b>4.02E+10</b>                 | <b>2.695</b>                          | <b>3.40E+05</b>                  | <b>9.29E+05</b>                                 |
| <b>Standard deviation</b>                            |     | <b>18</b>                 | <b>0.3</b>                  | <b>0.076</b>          | <b>1.52E+09</b>                 | <b>0.072</b>                          | <b>3.78E+05</b>                  | <b>9.43E+05</b>                                 |
| "Optimal" 6-module test condition                    | N=1 | 160                       | 63.3                        | 2.072                 | 4.14E+10                        | 2.776                                 | 0.00E+00                         | 0.00E+00                                        |
|                                                      | N=2 | 155                       | 61.2                        | 1.931                 | 3.86E+10                        | 2.842                                 | 0.00E+00                         | 0.00E+00                                        |
|                                                      | N=3 | 135                       | 61.3                        | 1.970                 | 3.94E+10                        | 2.762                                 | 0.00E+00                         | 0.00E+00                                        |
|                                                      | N=4 | 115                       | 61.4                        | 1.930                 | 3.86E+10                        | 2.526                                 | 0.00E+00                         | 0.00E+00                                        |
|                                                      | N=5 | 155                       | 61.5                        | 1.972                 | 3.94E+10                        | 2.758                                 | 0.00E+00                         | 0.00E+00                                        |
| <b>Mean</b>                                          |     | <b>144</b>                | <b>61.7</b>                 | <b>1.975</b>          | <b>3.95E+10</b>                 | <b>2.733</b>                          | <b>0.00E+00</b>                  | <b>0.00E+00</b>                                 |
| <b>Standard deviation</b>                            |     | <b>19</b>                 | <b>0.9</b>                  | <b>0.058</b>          | <b>1.15E+09</b>                 | <b>0.12</b>                           | <b>0.00E+00</b>                  | <b>0.00E+00</b>                                 |
| "Reduced" 3-module test condition                    | N=1 | 135                       | 61.4                        | 1.938                 | 3.88E+10                        | 2.685                                 | 0.00E+00                         | 0.00E+00                                        |
|                                                      | N=2 | 135                       | N/A                         | 2.057                 | 4.11E+10                        | 2.720                                 | 1.00E+01                         | 2.72E+01                                        |
|                                                      | N=3 | 155                       | 61.1                        | 1.943                 | 3.89E+10                        | 2.689                                 | 0.00E+00                         | 0.00E+00                                        |
| <b>Mean</b>                                          |     | <b>142</b>                | <b>61.3</b>                 | <b>1.979</b>          | <b>3.96E+10</b>                 | <b>2.698</b>                          | <b>3.33E+00</b>                  | <b>9.07E+00</b>                                 |
| <b>Standard deviation</b>                            |     | <b>12</b>                 | <b>0.2</b>                  | <b>0.067</b>          | <b>1.35E+09</b>                 | <b>0.02</b>                           | <b>5.77E+00</b>                  | <b>1.57E+01</b>                                 |
